# Supplementary material
Source: PubMed Central journal article supplement (PMC4196406)
Supplement: AFHS1402-0356SD1.pdf [file AFHS1402-0356SD1.pdf]

**Supplementary Figure 1. Representative microscopic images of human patients with SPNs.** (A) Lung paraneoplastic tissue; (B) Benign solitary pulmonary nodule; (C) Lung adenocarcinoma; (D) Lung squamous cell carcinoma. Lung tissues were resected by surgery from patients and fixed in 10% formalin and embedded in paraffin wax. Then blocks were sectioned into 5  $\mu\text{m}$  thickness and stained with hematoxylin and eosin (H&E) using a standard protocol. Scale bars: 100  $\mu\text{m}$ .

### Supplementary Figure 1

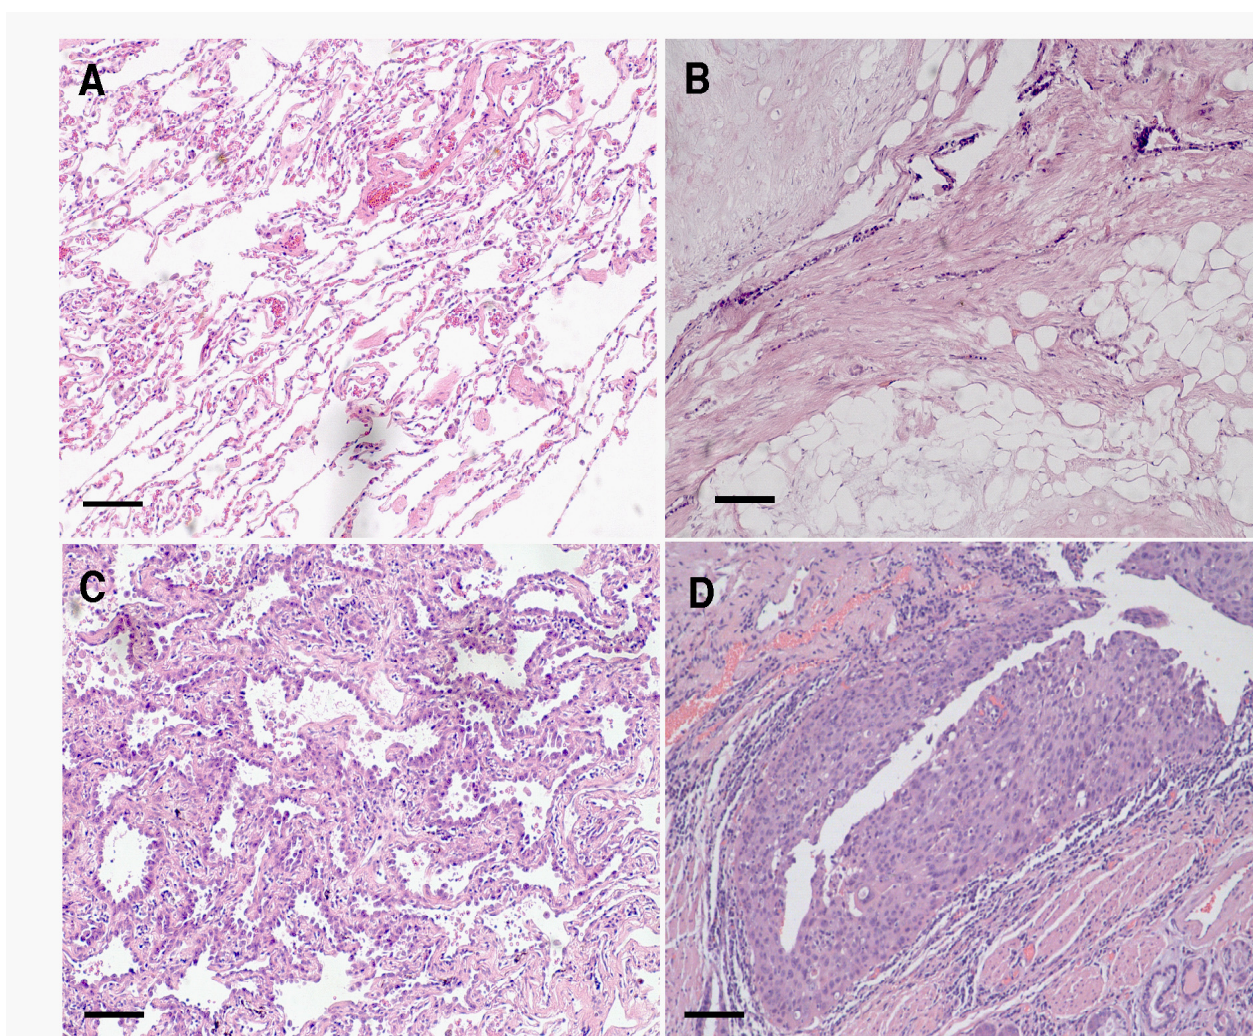

**Supplementary Figure 2. Serum levels of sex hormones were similar in two types of lung cancer.** There was no significant difference in the levels of (A) testosterone (B) estradiol (C) progesterone in patients with lung adenocarcinoma and patients with lung squamous carcinoma.

## Supplementary Figure 2

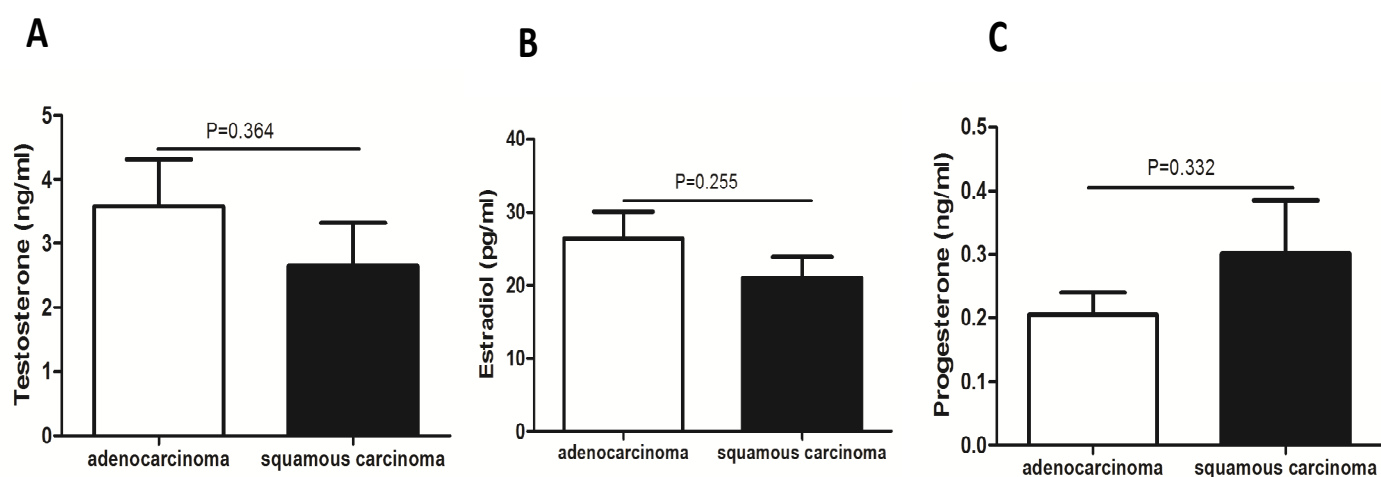

Supplementary Table 1. Abnormal elevated serum levels of CEA in 8 male patients with lung adenocarcinoma

| Case  | Age (years) | Smoking status | Cancer stage | CEA (ng/ml) | Normal range (<5.0 ng/ml) |
|-------|-------------|----------------|--------------|-------------|---------------------------|
| Case1 | 54          | Current        | I            | 25.4        |                           |
| Case1 | 48          | Current        | I            | 47.3        |                           |
| Case3 | 71          | Former         | I            | 35.8        |                           |
| Case4 | 67          | Current        | I            | 48.2        |                           |
| Case5 | 44          | Current        | I            | 8.2         |                           |
| Case6 | 49          | Current        | I            | 18.6        |                           |
| Case7 | 58          | Current        | I            | 14.2        |                           |
| Case8 | 65          | Current        | I            | 31.3        |                           |
